# Supplementary material
Source: Research Square preprint supplement (doi:10.21203/rs.3.rs-9155293/v1)
Supplement: Supplementary file 1 [file 7f3aa27851ffc8b65cc4c3c4.docx]

**Supplementary Materials**

1. **Materials and Methods**
   1.1 Diet Formulation for Rats

Table S1. Food consumption of rats

| Component (g) | NC | MASLD | ECHF |
| --- | --- | --- | --- |
| Casein | 200.0 | 200.0 | 220.4 |
| L-cystine | 3.0 | 3.0 | 3.5 |
| Corn starch | 397.5 | 325.5 | 304.5 |
| Dextrinized cornstarch | 132.0 | 114 | 114.4 |
| Sucrose | 100.0 | 88.0 | 80.0 |
| Lard | 0.0 | 102.0 | 100.0 |
| Soybean oil | 70.0 | 70.0 | 70.0 |
| Mixed minerals | 35.0 | 35.0 | 38.6 |
| Mixed vitamins | 10.0 | 10.0 | 11.0 |
| Choline | 2.5 | 2.5 | 2.5 |
| Cellulose | 50.0 | 50.0 | 55.1 |
|  | 1000.0 | 1000.0 | 1000.0 |
| Energy from macronutrients (%) | | | |
| Protein | 20.5 | 18.2 | 20.3 |
| Carbohydrate | 63.6 | 47.2 | 45.1 |
| Fat | 15.9 | 34.6 | 34.6 |

The feeding amount of the ECHF group was dynamically adjusted based on the energy intake of the control group at each stage. The rat feed was processed every three months and stored at -20°C to ensure palatability. The animal experimental protocol was approved by the Institutional Animal Care and Use Committee of Harbin Medical University, and all experiments were conducted in accordance with the guidelines for the use of experimental animals established by Harbin Medical University. We made every effort to minimize the number of animals used and the suffering involved in this study.

## 1.2 Construction of MASLD Model in Experimental Rats and ECHF Intervention Protocol

A total of 45 mice were randomly divided into a normal control (NC) group (N=17) and a MASLD model establishment group (N=28). After 20 weeks, 6 mice were randomly selected from each group to verify whether the modeling was successful. Subsequently, the MASLD group was further randomly divided into MASLD and ECHF groups. Finally, normal interventions were administered to the NC, MASLD, and ECHF groups, respectively (N=11 per group).

1.3 Histopathological Hematoxylin and Eosin (HE) Staining of Rat Liver and Intestinal Tissues

Liver and colon tissues were randomly collected from 5 rats in each group and fixed in 4% paraformaldehyde solution for more than two days for subsequent processing.

1. **Distilled Water Rinsing**: Tissues were cut into approximately 0.5 cm × 0.5 cm

pieces, placed in labeled plastic embedding cassettes, and rinsed under running water for about 1 hour.

(2) **Dehydration**: The cassettes were gently drained and immersed in a graded series of ethanol solutions (75%, 80%, 90%, and 95% for 30 minutes each; 100% ethanol twice for 20 minutes each) for gradual dehydration. Tissues were then immersed in n-butanol for 2 hours to overnight, followed by two 15-minute immersions in xylene to achieve transparency.

(3) **Wax Infiltration**: Tissues were placed in pre-warmed paraffin (55-60°C) three times, 30 minutes each.

(4) **Embedding**: Forceps and molds were pre-warmed in an oven. Paraffin was poured into the mold, and the tissue blocks were placed face down. The embedding cassette was then placed on top, and additional paraffin was poured in, ensuring no air bubbles were introduced. The embedded blocks were rapidly transferred to a 4°C refrigerator to solidify.

(5) **Sectioning**: Prior to sectioning, the paraffin blocks were frozen at -20°C for 30 minutes. The blocks were mounted on a microtome, and the cutting angle was adjusted to approximately 15 degrees. The initial trimming thickness was set to 20 μm until the tissue was exposed, followed by sectioning at 4-10 μm thickness. The sections were gently lifted with a brush to prevent curling.

(6) **Section Spreading**: Small sections of the paraffin ribbon were cut and floated on a pre-heated water bath (55°C) for spreading. Slides were vertically dipped into the water bath, and any floating paraffin was removed. If the tissue was overly dehydrated and prone to cracking, the paraffin block could be briefly immersed in a 45°C water bath until the tissue turned white.

(7) **Dewaxing and Rehydration**: Sections were placed in an 80°C oven for 30 minutes until the paraffin melted. Slides were then immersed in xylene I and II for 15 minutes each, followed by a graded ethanol series (100%, 95%, and 80% for 2 minutes each) and distilled water for 1 minute.

(8) **Hematoxylin and Eosin (HE) Staining**: Slides were stained with hematoxylin for 8-10 minutes, rinsed under running water for 1 minute, and differentiated in 1% acid alcohol for 1-2 seconds. After a brief water rinse, slides were blued in ammonia water for 5 seconds, rinsed in water for 1 minute, and immersed in distilled water for 1 minute. Eosin staining was performed for 1-2 minutes, followed by a quick rinse in 80% ethanol to stop the staining. Slides were then dehydrated in 95% and 100% ethanol (1 minute each) and cleared in xylene (2 minutes, repeated three times).

(9) **Mounting**: Resin glue was applied to the slides, and coverslips were placed to seal the sections, ensuring no air bubbles were trapped. The mounted slides were dried in an oven and examined under a light microscope for histopathological analysis after complete drying.

- 1. Sirius Red Staining of Liver Tissue

(1) **Dewaxing and Rehydration of Paraffin Sections**: Sections were sequentially immersed in xylene I for 20 minutes, xylene II for 20 minutes, absolute ethanol I for 10 minutes, absolute ethanol II for 10 minutes, 95% ethanol for 5 minutes, 90% ethanol for 5 minutes, 80% ethanol for 5 minutes, 70% ethanol for 5 minutes, and finally rinsed with distilled water.

(2) **Sirius Red Staining**: Sections were stained in saturated picric acid Sirius Red solution for 8 minutes.

(3) **Rinsing**: Sections were rinsed in absolute ethanol for several minutes until satisfactory results were observed under a microscope.

(4) **Mounting**: After drying in a 60°C oven, sections were cleared in xylene for 5 minutes and mounted with neutral resin.

(5) **Microscopic Examination and Image Analysis**: Stained sections were examined under a microscope, and images were captured for analysis.

Staining Results: Under an optical microscope, collagen fibers appeared red, and the background was yellow. Under polarized light, type I collagen appeared as orange or bright red thick fibers, while type III collagen appeared as green thin fibers.

- 1. Periodic Acid-Schiff (PAS) Staining of Rat Colon

To observe the number and morphology of goblet cells in the colon, Periodic Acid-Schiff (PAS) staining was performed. The detailed staining procedure was as follows:

(1) **Dewaxing of Paraffin Sections**: The sections were dewaxed using the same method as described for HE staining.

(2) **Oxidation with Periodic Acid**: Sections were treated with periodic acid for 10 minutes.

(3) **Rinsing**: Sections were rinsed under running water.

(4) **Staining with Schiff Reagent**: Sections were stained with Schiff reagent in the dark for 10 minutes.

(5) **Rinsing with Sodium Metabisulfite Solution**: Sections were immersed in 0.5% sodium metabisulfite solution three times, 2 minutes each.

(6) **Rinsing**: Sections were rinsed under running water.

(7) **Counterstaining with Hematoxylin**: Sections were stained with hematoxylin for 2 minutes.

(8) **Rinsing**: Sections were rinsed under running water.

(9) **Dehydration and Mounting**: Sections were dehydrated in a graded ethanol series and mounted using the same method as described for HE staining.

- 1. UPLC-Q-TOF-MS/MS Analysis of Rat Liver Metabolomics: Detailed Procedures and Subsequent Analysis Workflow

1.6.1 Liver Tissue Pretreatment Steps

1. Accurately weigh 40 mg of liver tissue and place it into a 2 mL MP homogenization tube. Add 150 μL of PBS (w:v = 1:3) to the tube and homogenize on ice three times, 20 seconds each. Then, add 1.5 mL of pre-cooled isopropanol-methanol mixture (v:v = 3:1) and repeat the homogenization process. Transfer the mixture to a new 2 mL EP tube and centrifuge at 4°C and 15,000 rpm for 15 minutes. To maximize metabolite extraction, the supernatant is subjected to organic phase extraction, while the pellet is used for aqueous phase extraction.

(1) **Organic Phase Extraction**: Transfer the supernatant to a new EP tube and centrifuge at 4°C and 15,000 rpm for 15 minutes. Filter the supernatant through an oil-resistant nylon membrane to ensure no visible white precipitates remain.

(2) **Aqueous Phase Extraction**: Add 1.5 mL of pre-cooled methanol-water solution (v:v = 1:1) to the pellet and homogenize on ice three times, 20 seconds each. Transfer the mixture to a new EP tube and centrifuge at 4°C and 15,000 rpm for 15 minutes. Filter the supernatant through a water-resistant polyethersulfone membrane to ensure no visible white precipitates remain.

(3) **Sample Preparation for Analysis**: Dry the extracted samples under a stream of nitrogen and store at -80°C overnight. The next day, reconstitute the samples in 120 μL of acetonitrile-water solution (v:v = 3:1). Centrifuge at 4°C and 15,000 rpm for 15 minutes, then transfer 80-100 μL of the supernatant to an insert vial, ensuring no bubbles are present.

(4) **Quality Control (QC) Sample Preparation**: Pool equal volumes of all processed samples and mix thoroughly to prepare a quality control (QC) sample.

2. Accurately weigh 40 mg of fecal sample and place it into a 2 mL MP grinding tube. Add 1 mL of methanol-water solution (v:v = 3:1) and incubate at 4°C for 30 minutes. Homogenize the sample using an MP homogenizer (parameters: 6 M/S, 20 seconds) for a total of four cycles, with 2-minute ice baths between each cycle. Centrifuge the homogenized sample at 4°C and 12,000 rpm for 10 minutes, then transfer 600 μL of the supernatant to a new 1.5 mL EP tube. Centrifuge again at 4°C and 15,000 rpm for 10 minutes, and transfer 400 μL of the supernatant to another new 1.5 mL EP tube. Finally, transfer 200 μL of the supernatant to an insert vial for analysis. To prepare the quality control (QC) sample, randomly select 24 processed samples, pool 50 μL from each, and mix thoroughly.

1.6.2 UPLC-QTOF-MS/MS Conditions

Chromatographic separation was performed using a Waters ACQUITY UPLC system (Waters, Milford, MA) equipped with a BEH C18 column (100 × 2.1 mm; id. 1.7 μm; Waters). A 2 μL sample was injected via a 4°C autosampler onto the column maintained at 35°C, with a flow rate of 0.45 mL/min. The mobile phases consisted of solvent A (0.1% formic acid in water) and solvent B (pure acetonitrile). The gradient elution program was as follows: 2% B (0–0.5 minutes), 2–20% B (0.5–7 minutes), 20–35% B (7–8 minutes), 35–70% B (8–9.5 minutes), 70–98% B (9.5–11 minutes), 98% B (11–13 minutes), 2% B (13–14 minutes), and 2% B (14–16 minutes). Acetonitrile was used as a blank control, injected every 10 samples, and quality control (QC) samples were injected every 10 samples to eliminate batch effects.

Mass spectrometry was performed using a Waters Micromass Q-TOF (Waters, Manchester, U.K.) equipped with electrospray ionization (ESI) in both positive and negative modes. The parameters were set as follows: capillary voltage, 0.5 kV; sample cone voltage, 60 V; collision energy, 6 eV; source temperature, 110°C; desolvation gas (nitrogen) flow rate, 900 L/h; desolvation temperature, 450°C; cone gas (nitrogen) flow rate, 50 L/h; collision gas, argon; and MCP detector voltage, 2550 V. The mass scan range was 50–1200 m/z over 0–16 minutes. Leucine enkephalin (200 pg/μL) was used as the lock mass for calibration ([M+H] = 556.2771, [M+H] = 554.2615). The scan frequency was set to 0.2 seconds every 15 seconds for calibration. MS/MS spectra of potential biomarkers were analyzed using UPLC-MS/MS.

1.6.3 Data Processing

The raw data were uploaded to QI (version 2.1; Waters Corporation, Milford, MA). Substances with retention times before 0.5 minutes and after 11.0 minutes were excluded. Preprocessing steps, including chromatographic peak identification, peak matching, and peak area normalization, were performed using Micromass Markerlynx software. Classification trends and screening of metabolites with significant contributions to classification (VIP > 1.0, fold change > 1.2 or < 0.5, and p < 0.05) were analyzed using EZ-info (version 2.0; Umetrics AB, Umea, Sweden) and SIMCA-P (version 12.0; Umetrics AB, Umea, Sweden). Principal Component Analysis (PCA) was conducted using QC samples and all experimental samples to evaluate data reproducibility and quality. Partial Least Squares Discriminant Analysis (PLS-DA) and Orthogonal Projections to Latent Structures Discriminant Analysis (OPLS-DA) were applied to visualize the maximum separation among the control, MASLD, and ECHF groups. To avoid overfitting of the models in SIMCA-P (version 12.0; Umetrics AB, Umea, Sweden), permutation testing (n = 200) was performed.

The exact masses of biomarkers were determined using Q-TOF/MS. Molecular formulas or masses were searched against databases such as ChemSpider, HMDB, and others to identify potential chemical structures. Metabolites were confirmed by comparing retention times and MS/MS spectra with reference standards or database entries. Metabolite identification was performed using QI software connected to online databases (mass error tolerance set at 10 ppm), including ChemSpider ([http://www.ChemSpider.com](http://www.chemspider.com/)), Human Metabolome Database (HMDB, [http://www.HMDB.ca](http://www.hmdb.ca/)), Metlin ([http://Metlin.scripps.edu/](http://metlin.scripps.edu/)), and PubChem ([http://Pubchem.ncbi.nlm.nih.gov/](http://pubchem.ncbi.nlm.nih.gov/)). Additionally, the MassFragment™ application manager (MassLynx v4.1, Waters Corp., USA) was used to facilitate MS/MS fragment ion analysis based on chemically intelligent peak-matching algorithms. Pathway analysis was subsequently performed using MetaboAnalyst (<https://www.metaboanalyst.ca/>).

1.7 Transcriptomic Analysis of Rat Liver

1.7.1 PCA, Differentially Expressed Genes (DEGs), and Functional Enrichment GSEA Analysis

Principal Component Analysis (PCA) is a statistical method used to reduce the dimensionality of datasets and visualize sample clustering based on gene expression profiles, identifying differences between control and experimental groups. Differentially expressed genes (DEGs) were identified using DESeq2 with the following criteria: fold change > 2.00 and p-value < 0.05. To uncover the biological mechanisms underlying these expression data, gene set enrichment analysis (GSEA) was performed using eVITTA@UBC (<https://tau.cmmt.ubc.ca/eVITTA/>) with reference to the MSigdb database. Enrichment analyses included GO, KEGG, Reactome, and WikiPathways, with significant pathways defined by an absolute normalized enrichment score (NES) ≥ 1, nominal p-value < 0.05, and false discovery rate (FDR) < 0.25. The results of the enriched pathways were visualized using the eVITTA platform.

1.7.2 PPI Network and Module Analysis

To analyze the relationships among DEGs, input files generated from the STRING online database ([http://string-db.org](http://string-db.org/)) were imported into Cytoscape for protein-protein interaction (PPI) network analysis. Cytoscape is a software tool for complex network analysis and visualization. Module analysis was conducted using the MCODE (Molecular Complex Detection) plugin in Cytoscape with the following parameters: node degree ≥ 2, node score ≥ 0.2, k-core ≥ 2, and maximum depth = 100. Finally, the screened cluster networks were visualized using Cytoscape.

1.8 Fluorescence Quantitative PCR Analysis of Rat and *Drosophila* Tissues

1.8.1 RNA Extraction from Rat Liver, Intestine, and *Drosophila*

To validate the reproducibility of tar get genes hypothesized in the experiment, real-time quantitative polymerase chain reaction (qPCR) was performed on rat tissue samples. Liver and colon tissues were retrieved from the -80°C freezer, and approximately 50 mg of tissue (or 20 *Drosophila melanogaster*) was accurately weighed and transferred into a 2 mL MP homogenization tube. Then, 1 mL of TRIzol Reagent was added, and the samples were homogenized on ice three times, 20 seconds each. The homogenate was transferred to a new EP tube and centrifuged (4°C, 12,000 rpm, 10 minutes). The supernatant was collected into a new EP tube, and 0.2 volumes of chloroform were added. The mixture was vigorously shaken for 15 seconds and left at room temperature for 15 minutes. After centrifugation (4°C, 12,000 rpm, 10 minutes), three distinct layers formed: the upper colorless aqueous phase containing RNA, the middle white interphase containing proteins and DNA, and the lower pink organic phase. If the supernatant still appeared cloudy, additional chloroform extraction was performed. The clear aqueous phase was transferred to a new tube, and an equal volume of pre-cooled isopropanol (4°C) was added. The mixture was gently mixed and incubated at room temperature for 10 minutes, followed by centrifugation (4°C, 12,000 rpm, 10 minutes). The supernatant was discarded, and the RNA pellet was washed with 1 mL of 75% ethanol by gently resuspending the pellet. The sample was centrifuged again (4°C, 12,000 rpm, 10 minutes), and the supernatant was discarded. This step was repeated with 1 mL of 100% ethanol. After the final centrifugation, the tube was inverted on clean absorbent paper to remove residual organic solvents. Once the pellet was dry, an appropriate volume of DEPC-treated water was added to dissolve the RNA. RNA concentration was measured using a Nanodrop instrument, and the concentrations of all samples were normalized.

1.8.2 Real-Time PCR

(1) **cDNA Synthesis**:
cDNA was synthesized using a high-capacity cDNA reverse transcription kit according to the manufacturer’s instructions. The reverse transcription reaction system was as follows:

| System | 10µl |  |
| --- | --- | --- |
| Transciptor RT Buffer (10×) | 2µl |  |
| dNTPs (20×) | 0.8µl |  |
| RT primer (10×) | 2µl |  |
| Enzyme | 1µl |  |
| DEPC Warer | 4.2µl |  |

A 10 μL reaction system was prepared, and 10 μL of sample RNA was added, making a total volume of 20 μL. The mixture was gently mixed and subjected to amplification. The reaction program was set as follows: 25°C for 10 minutes, 37°C for 120 minutes, 85°C for 5 minutes, and 4°C indefinitely. The synthesized cDNA was stored at 4°C for use in real-time PCR the following day.

(2) **Primer Design and Preparation**:
Primers were designed using Primer5 software and the NCBI online primer design tool (Primer-BLAST, <http://www.ncbi.nlm.nih.gov/tools/primer-blast>), followed by sequence alignment using Oligo7. The primers were synthesized by Sangon Biotech Co., Ltd. After centrifugation at 4,000 rpm for 1 minute, the primer powder was collected at the bottom of the tube. A specific volume of nuclease-free water was added according to the manufacturer’s instructions to prepare a 100 μM primer stock solution. Prior to real-time PCR experiments, the primer stock solution was diluted to 10 μM (as shown in the figure below).

Real-time fluorescence quantitative PCR was performed using the Roche 480 Real-time PCR system (Applied Biosystems, CA, USA). The primer sequences are listed in Table 2. Rp49 was used as the internal reference gene, and the relative gene expression levels were calculated using the comparative Ct method (2^(-ΔΔCt)).


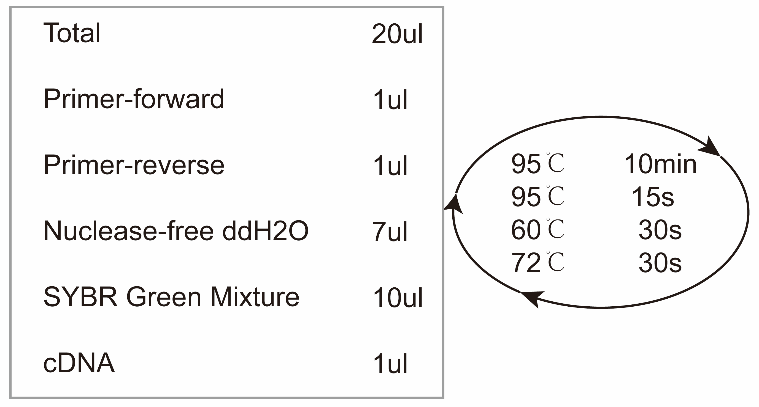


- 1. *Drosophila* Diet Formulation and Detailed Experimental Procedures

1.9.1 Preparation of Culture Medium

For example, the preparation of 1000 mL of control culture medium is described below. The *Drosophila* food components are listed in Table S2.

(1) Weigh 50 g of cornmeal and place it into a large beaker containing 500 mL of autoclaved ddH2O. Stir thoroughly to mix.

(2) Add 600 mL of autoclaved ddH2O to an electric rice cooker and bring to a boil. Add 5.5 g of agar while continuously stirring. Pour the cornmeal mixture from step 1) into the cooker and stir until the total volume reaches 1000 mL. Turn off the heat.

(3) Sequentially add 145 g of glucose and 91 g of sucrose, stirring continuously until fully dissolved.

(4) Allow the mixture to cool naturally for 10 minutes. Add 18 g of yeast and mix well. Then, add 15 mL of 20% Tegosept and 3 mL of propionic acid, stirring thoroughly to ensure homogeneity.

(5) Transfer the medium to a medium dispenser. Control the flow lever to fill *Drosophila* vials to a height of 2.5–3 cm.

(6) Place the filled vials horizontally on a clean laboratory bench and cover them with two layers of gauze to prevent contamination by flies.

(7) Leave the vials at room temperature overnight to allow the medium to dry. Seal the vials tightly with foam plugs and store at 4°C for up to one week.

**Note**: Continuous stirring is required throughout the heating process to prevent clumping or burning. For high-fat medium, add 70 g of lard and 10 mL of emulsifier after mixing the cornmeal in step 2). For medium containing mixed antibiotics, add the appropriate volume of antibiotics to achieve the desired final concentration when the medium cools to 55–60°C, mix thoroughly, and then dispense.

Table S2. Food consumptions of larva and fly

| Component (g) | NC | MASLD | ECHF |
| --- | --- | --- | --- |
| Agar | 5.5 | 5.5 | 5.5 |
| Corn meal | 50 | 50 | 50 |
| Dextrose | 145 | 145 | 48.29 |
| Sucrose | 91 | 91 | 30.3 |
| Lard | 0 | 70 | 70 |
| Yeast | 18 | 18 | 18 |
| 20% Tegosept | 15 | 15 | 15 |
| Propionic acid | 3 | 3 | 3 |
| Water | 1000ml | 1000ml | 1000ml |
| Calorie (cal) |  |  |  |
| Carbohydrate | 1087.45 | 1087.45 | 457.81 |
| Protein | 75.46 | 75.46 | 75.46 |
| Fat | 15.50 | 645.5 | 645.50 |
| Total calorie | 1178.41 | 1808.41 | 1178.77 |

- - 1. Replacement of *Drosophila* Culture Medium

The maintenance of *Drosophila* strains relies on regular replacement of the culture medium for continuous cultivation. The procedure is as follows:

(1) Select *Drosophila* vials with a thicker layer of medium and remove them from the refrigerator in advance. Allow the vials to reach room temperature until condensation disappears before use.

(2) Place a soft pad (e.g., a mouse pad) on the laboratory bench. Gently tap the *Drosophila* vial to ensure the flies fall to the bottom (avoiding contact with the medium).

(3) Quickly remove the foam plug from the old vial and invert the new vial over the old one, aligning the openings.

(4) Gently tap the vials on the soft pad several times to transfer most of the flies into the new vial (avoid transferring dead flies or medium from the old vial).

(5) Quickly plug both the new and old vials with foam plugs to prevent flies from escaping.

(6) Place the new vial on the strain preservation tray and the old vial on the waste tray.

**Note**: The entire process must be performed carefully to prevent flies from escaping. If any flies escape, they must be immediately captured and eliminated to avoid contamination.

1.9.3 Survival Analysis of *Drosophila melanogaster*

Newly eclosed 1-day-old male flies were collected and divided into groups of 20 flies per vial. The flies were subjected to five different dietary conditions: Normal Control (NC), High-Fat Diet-Induced Group (MAFLD), Energy-Restricted High-Fat Diet Group (ECHF), Microbiota Transplant Group (MASLD-Ir), and Antibiotic-Treated Group (MASLD-Ix). The flies were maintained at 25°C with 60% humidity under a 12-hour light/12-hour dark cycle. Mortality was recorded daily until all flies had died. Every three days, the flies were transferred to fresh food vials, and any dead flies were removed during the medium change. Each group consisted of 15 vials of the *w1118* *Drosophila melanogaster* strain.

1.9.4 Measurement of Body Weight, Food Intake, and Climbing Ability in *Drosophila melanogaster*

1.9.4.1 Body Weight Measurement

Due to the small body weight of individual flies, to minimize experimental error, five flies were weighed together, and 30 measurements were taken for each group. Each measurement was then divided by five to determine the average body weight per fly. In the first phase, after 20 days of high-fat diet induction, flies from two groups were lightly anesthetized with ether and weighed to assess the success of the MASLD model. In the second phase, at the end of day 42, flies from three groups were lightly anesthetized with ether and weighed.

1.9.4.2 Food Intake Assay

(1) Preheat the balance for 15 minutes. Dissolve 1 g of sucrose in 20 mL of autoclaved ddH2O to prepare a 5% sucrose solution as a blank control. Then, dissolve 0.25 g of Brilliant Blue powder in 10 mL of the 5% sucrose solution to prepare a 25% Brilliant Blue-sucrose solution for experimental use.

(2) Allow the culture media for the control group (NC) and the isocaloric high-fat diet group (ECHF) to equilibrate to room temperature, with seven vials per group. Place filter paper discs on the surface of the media, add 100 µL of the Brilliant Blue solution, and spread evenly. Place another filter paper disc on top and add another 100 µL of the Brilliant Blue solution. Leave the vials open for approximately 2 hours. If the media are excessively moist, gently press down with a cotton swab stick and ensure any Brilliant Blue solution splashed on the walls is wiped clean. For the blank control group, add two filter paper discs and the same volume of sucrose solution without Brilliant Blue.

(3) Thirty-day-old flies were starved for 2 hours before the experiment. Transfer the starved flies into the prepared Brilliant Blue or blank media. Invert the prepared media vials to allow the flies to naturally climb into them, with 25–30 flies per vial. Plug the vials with cotton (slightly lower than usual to reduce space and encourage feeding) and record the start time for each vial.

(4) After 40 minutes of feeding, transfer the flies into empty culture tubes and quickly place them in liquid nitrogen to euthanize. Select flies that have ingested Brilliant Blue without contamination and are intact, and transfer them into 2 mL MP homogenization tubes, ensuring four tubes per group with 20 flies each.

(5) Add 1 mL of PBS to each homogenization tube and homogenize three times for 20 seconds each. Centrifuge at 4°C and 13,000 g for 10 minutes. Filter the supernatant and transfer 200 µL into a 96-well plate, with three technical replicates per sample.

(6) Prepare a Brilliant Blue standard curve using PBS, with concentrations of 50 µg/mL, 12.5 µg/mL, 6.25 µg/mL, 3.125 µg/mL, and 1.5625 µg/mL. Add 200 µL of each concentration to the 96-well plate and measure the absorbance at 625 nm.

1.9.4.3 Climbing Assay
For the control group (NC), high-fat diet-induced group (MASLD), and energy-restricted high-fat diet group (ECHF), four vials per group, each containing 10 thirty-day-old flies, were used to assess locomotor activity. Place the vials on a glass surface and gently tap the bottom to ensure all flies fall to the base. Start a 12-second timer and record the number of flies that climb to or above 8 cm within 12 seconds. Repeat the assay three times for each vial and calculate the average.

1.9.5 Fat Body Staining in *Drosophila melanogaster*

(1) **Dissection and Fixation**: The surface chitin of the flies was washed away using PBS. Under a stereomicroscope, fat bodies were dissected from 42-day-old flies of the control group (NC), high-fat diet-induced group (MASLD), energy-restricted high-fat diet group (ECHF), microbiota transplant group (MASLD-Ir), and antibiotic-treated group (MASLD-Ix). Ten flies were dissected per group, and each fat body was immediately transferred into a well of a six-well plate containing PBS, with appropriate labeling. After dissection, all fat bodies were fixed in 4% paraformaldehyde for 1 hour. Subsequently, the samples were washed three times with ice-cold PBS, 5 minutes each.

(2) **Staining**: A Nile Red stock solution was prepared in advance (Nile Red:PBS = w:v = 1:1) at a concentration of 1 mg/mL. Forty microliters of the stock solution were added to 20 mL of ice-cold PBS and mixed thoroughly at a 500:1 ratio. Four milliliters of the Nile Red staining solution were added to each well of the six-well plate, and the fat bodies were stained for 1 hour. After staining, the samples were washed three times with ice-cold PBS, 5 minutes each.

(3) **Mounting and Imaging**: The fat bodies from each group were placed on glass slides, covered with BODIPY dye, and sealed with a coverslip. The samples were observed under a confocal laser scanning microscope. All staining and imaging procedures were performed under light-protected conditions to prevent photobleaching.

1.9.6 Smurf Assay in Drosophila melanogaster

The intestinal tract of *Drosophila melanogaster* maintains a dynamic equilibrium, characterized by high integrity and low permeability. Therefore, the integrity and permeability of the fly intestine can serve as indicators of intestinal damage. After fasting for 2 hours, 42-day-old flies from the control group (NC), high-fat diet-induced group (MASLD), and energy-restricted high-fat diet group (ECHF) were transferred into media containing either 25% Brilliant Blue-sucrose solution or 5% sucrose solution (blank control) for 9 hours. The number of "Smurf" flies, characterized by systemic blue coloration, was observed under a microscope. Each group consisted of four vials, with 25 flies per vial. Flies exhibiting complete blue coloration throughout their bodies were identified as "Smurf" flies.

1.9.7 Metagenomic Sequencing of *Drosophila melanogaster*

Flies were lightly anesthetized with ether, and surface microorganisms were removed using 70% ethanol. The flies were then gently swept into sterilized cryotubes using a feather and immediately euthanized in liquid nitrogen. Each group included six biological replicates. DNA extraction was performed using a standardized CTAB protocol. Paired-end libraries were constructed using a specific kit, and after quality control, high-throughput sequencing was conducted on the NovaSeq 6000 platform with a PE150 sequencing mode. The main steps of library construction included: fragmentation of genomic DNA by ultrasonication, end repair of DNA fragments, addition of an 'A' base to the 3' end of DNA fragments, ligation of sequencing adapters, fragment selection, and PCR amplification.

(1) **Data Preprocessing**: Raw sequencing data were processed to remove adapters and low-quality sequences. In cases where the host genome was known, host sequences were removed to ensure that subsequent assembly and analysis results were derived solely from microbial sequences, thereby improving the accuracy of species and functional annotations.

(2) **Metagenomic Assembly**: After preprocessing, de novo assembly was performed for each individual sample.

(3) **Gene Prediction**: Coding sequences (CDS) were predicted from the assembled contigs, and short contig sequences were filtered out. A non-redundant Unigene set was obtained through sequence clustering.

(4) **Species Annotation**: Unigenes were aligned against the NR_meta database to obtain taxonomic classification at various levels. Alpha and Beta diversity analyses were conducted based on species annotation results at the species level.

(5) **Functional Annotation**: Unigenes were aligned against eight functional databases, including GO, KEGG, eggNOG, CAZy, CARD, PHI, MGEs, VFDB, and BacMet, to obtain functional annotation information.

(6) **Statistical and Comparative Analysis**: Abundance statistics and differential analysis were performed at the taxonomic, functional, and Unigene levels. Enrichment analysis of differentially expressed Unigenes was conducted using the GO and KEGG databases.

1.9.8 Fecal Microbiota Transplantation (FMT) Experiment in *Drosophila melanogaster*

1.9.8.1 Preparation of Mixed Antibiotics

(1) Accurately weigh 1 g of ampicillin and dissolve it in 10 mL of autoclaved ddH2O. Mix thoroughly, aliquot, and store at -20°C. The concentration of the stock solution is 100 mg/mL. Add 1 mL of the stock solution to 200 mL of culture medium to achieve a final concentration of 500 µg/mL.

(2) Accurately weigh 0.05 g of tetracycline hydrochloride and dissolve it in 10 mL of autoclaved ddH2O. Mix thoroughly, aliquot, and store at -20°C. The concentration of the stock solution is 5 mg/mL. Add 2 mL of the stock solution to 200 mL of culture medium to achieve a final concentration of 50 µg/mL.

(3) Accurately weigh 1 g of rifampicin and dissolve it in 10 mL of DMSO. Mix thoroughly, aliquot, and store at -20°C. The concentration of the stock solution is 100 mg/mL. Add 0.4 mL of the stock solution to 200 mL of culture medium to achieve a final concentration of 200 µg/mL. The final concentration of DMSO is 0.2%.

1.9.8.2 Fecal Microbiota Transplantation Procedure

Starting on day 26 (after microbial depletion), 30 randomly selected flies from the ECHF group were anesthetized with ether, immersed in 70% ethanol for 2 minutes, and washed twice with sterile water. The flies were then transferred into a 2 mL MP tube, and 500 µL of sterile PBS was added. The flies were homogenized three times for 20 seconds each, and the homogenate was cultured in Luria-Bertani (LB) broth at 30°C. Bacterial pellets were obtained by centrifugation at 3000 g for 5 minutes, washed twice with sterile PBS, and resuspended in PBS. The optical density (OD595) was measured, and an OD595 of 1 was considered equivalent to 10^8 cells/mL. Twenty milliliters of the bacterial suspension were added to 200 mL of culture medium to achieve a final concentration of 10^7 cells/mL. The bacterial suspension was added to the medium when it cooled to 55–60°C, forming the MASLD-Ir group. The intervention continued until the end of the experiment on day 42. Medium changes for the MASLD-Ir group were performed in a biosafety cabinet.

1.9.8.3 Bacterial Plating Assay

To ensure the effectiveness of the transplantation process, the isocaloric high-fat diet containing mixed antibiotics was replaced at 8:00 AM on day 21. Three days after antibiotic intervention (day 23) and two days after transplantation (day 25), the intestinal microbiota growth of the isocaloric high-fat diet group was assessed by inoculating fly homogenates onto LB agar plates (Figure 8). The homogenates were diluted 1000-fold or 10,000-fold before plating.

(1)Preparation of LB Agar: Dissolve 2 g of tryptone, 1 g of yeast extract, 2 g of sodium chloride, and 3 g of agar in 200 mL of ddH2O. Autoclave at 121°C for 30 minutes, cool in a biosafety cabinet, and pour into cell culture dishes. Allow the agar to solidify for approximately 2 minutes before use.

(2) Twenty flies per tube were immersed in 70% ethanol for 2 minutes, washed twice with sterile water, and transferred into a 2 mL MP tube. One milliliter of sterile PBS was added, and the flies were homogenized three times for 20 seconds each.

(3) The homogenate was serially diluted 10-fold, 100-fold, 1000-fold, and 10,000-fold, and evenly spread onto LB agar plates. Bacterial growth was observed after 24 and 48 hours.

# **2. Supplementary Figures and Figure Legends**


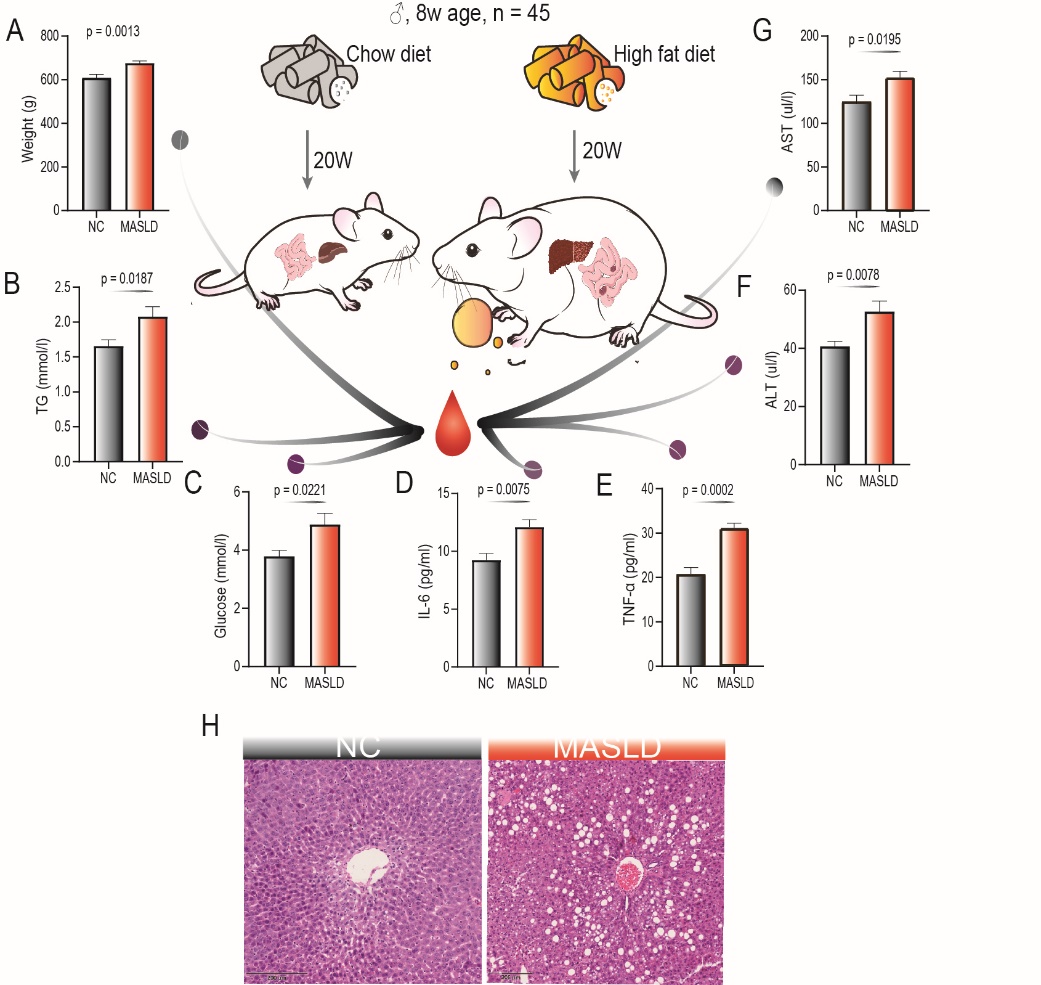


**Figure S1. Study Design and MASLD-Related Phenotypic Characterization.** (A-G) A 35% high-fat diet induces metabolic dysfunction-associated steatotic liver disease (MASLD) in rats, as evidenced by (A) body weight changes, (B) serum triglyceride (TG) levels, (C) blood glucose levels, (D) interleukin-6 (IL-6) levels (n = 6), (E) tumor necrosis factor-alpha (TNF-α) levels (n = 6), (F) alanine aminotransferase (ALT) activity, and (G) aspartate aminotransferase (AST) activity at 20 weeks. (H) Representative hematoxylin and eosin (H&E)-stained images of liver sections from the normal control (NC) and MASLD groups (scale bar = 200 µm; n = 4).


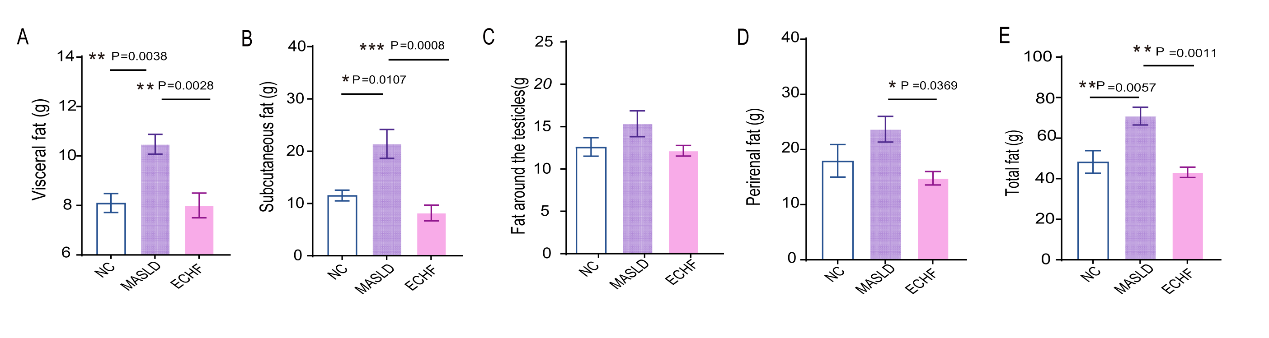


**Figure S2. Weights of total fat and various white adipose tissue depots in rats after ECHF intervention.** (A) Visceral fat mass. (B) Subcutaneous fat mass. (C) Fat mass around the testes. (D) Perirenal fat mass. (E) Total fat mass.


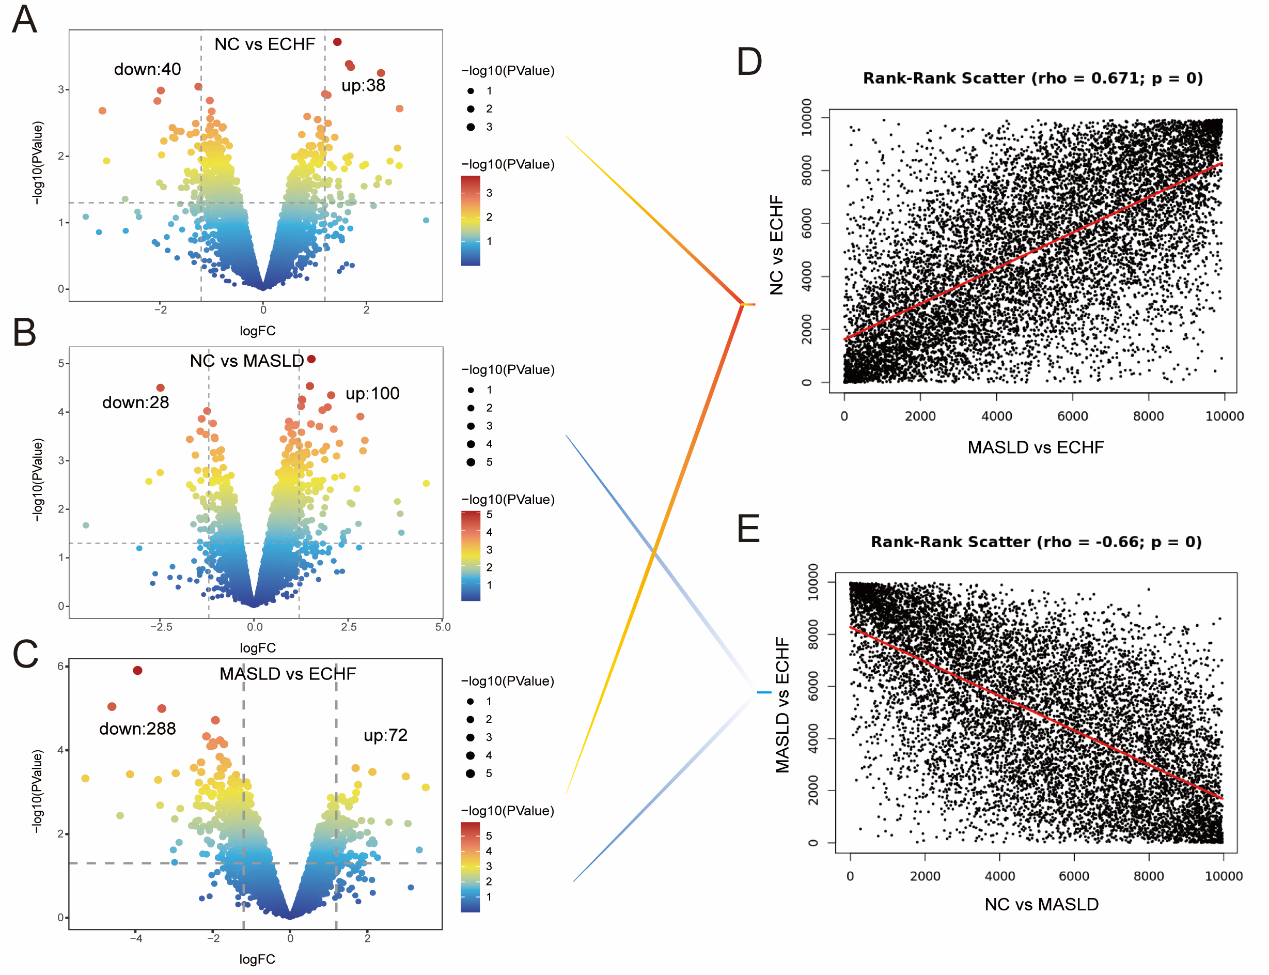


**Figure S3.** (A-C) Volcano plot of differentially expressed genes (DEGs) between NC and ECHF group (A), between NC and MASLD group (B), between MASLD and ECHF group (C). (D-E) Rank–rank scatter plots between NC vs. ECHF and MASLD vs. ECHF groups (D), between NC vs. MASLD and MASLD vs. ECHF groups (E).


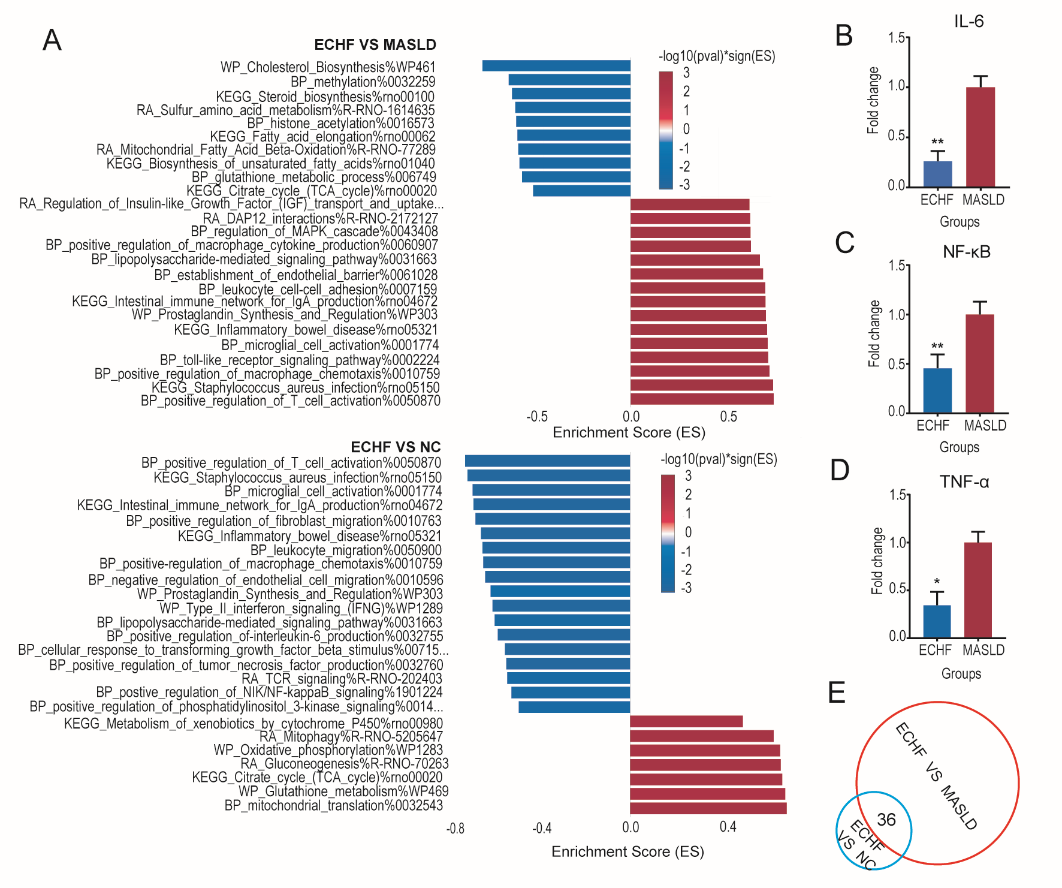


**Figure S4. ECHF Ameliorates High-Fat Diet-Induced MASLD by Reducing Inflammation.**(A) Gene Set Enrichment Analysis (GSEA) of differentially expressed genes (DEGs). The Normalized Enrichment Score (NES) indicates the degree of enrichment, with higher values representing more significant enrichment. Red bars denote up-regulated genes, and blue bars denote down-regulated genes. (B-D) The mRNA expression levels of IL-6, NF-κB, and TNF-α (n = 3). (E) Venn diagram illustrating the overlap of DEGs between the ECHF vs Control and ECHF vs MASLD groups.


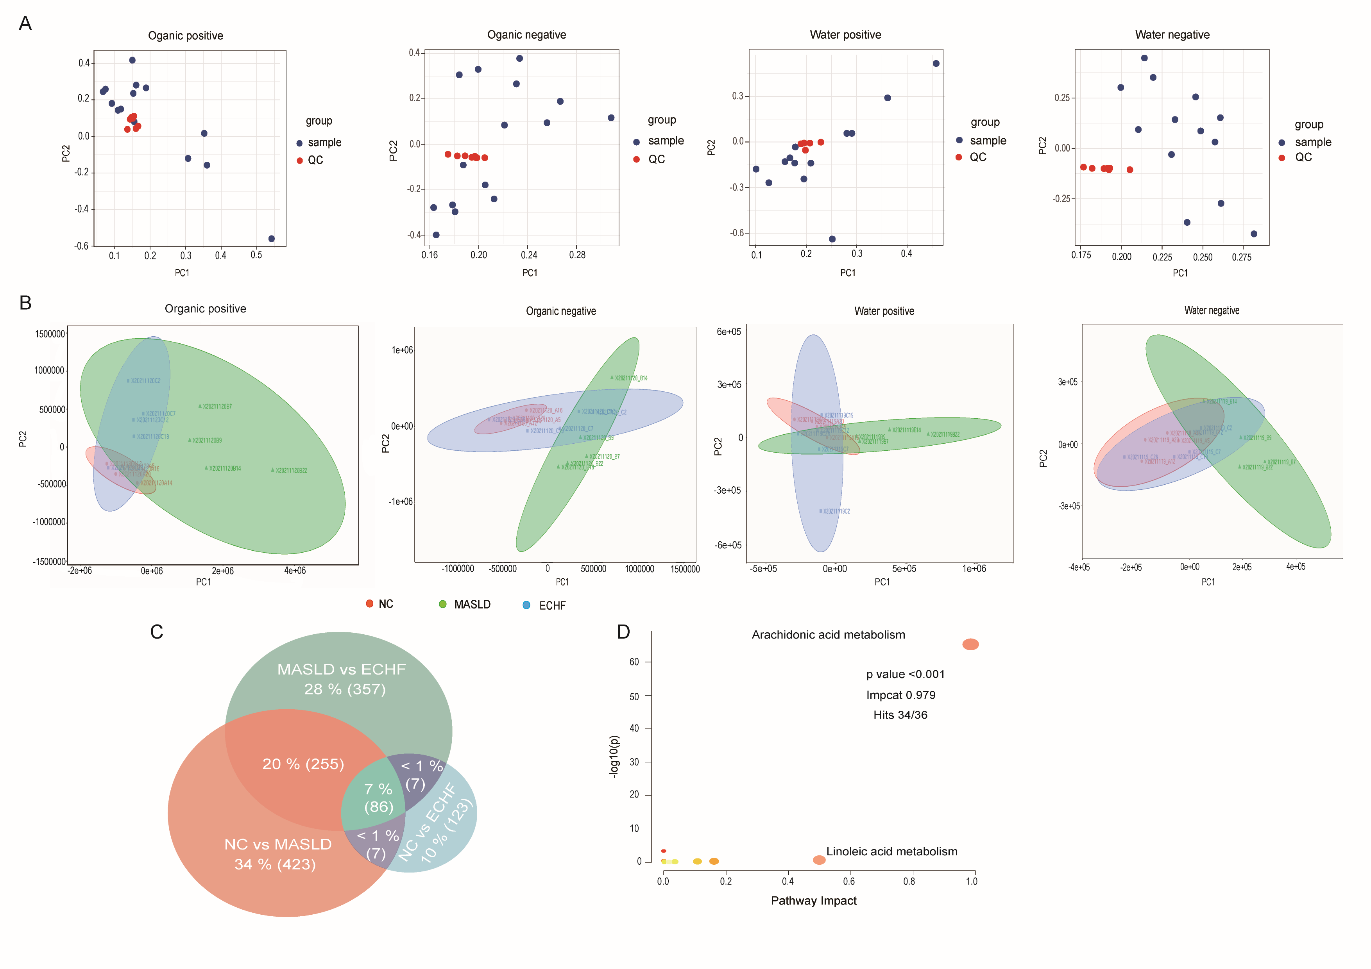


**Figure S5. Multivariate analysis of non-targeted metabolites across four phage groups.** (A) Principal Component Analysis (PCA) score plots demonstrating metabolite profiles in both positive and negative ion modes for organic and aqueous phases. (B) Partial Least Squares Discriminant Analysis (PLS-DA) score plots illustrating distinct clustering patterns in positive and negative ion modes for organic and aqueous phases. (C) Venn diagram representation of significantly differentiated metabolites among the three experimental groups. (D) Kyoto Encyclopedia of Genes and Genomes (KEGG) pathway analysis of differentially expressed metabolites between MASLD and ECHF groups.

Figure S6. Metcape results of differentially expressed genes (DEGs) and significant metabolites. (For details, please refer to the uploaded PDF file of Figure S6)


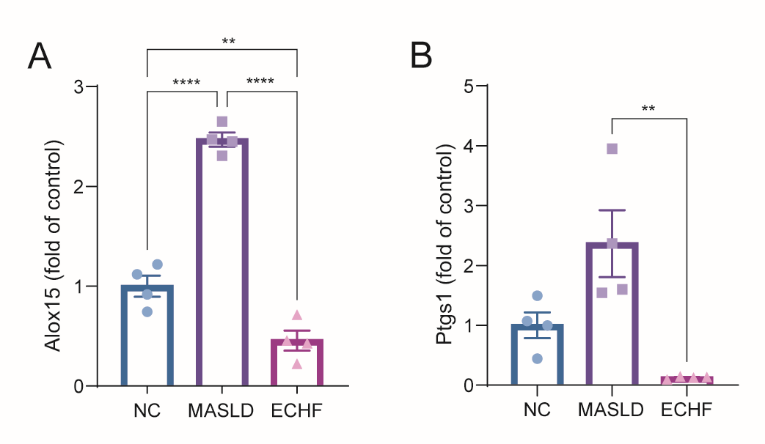


Figure S7. Quantitative PCR (qPCR) results of critical enzymes related to arachidonic acid metabolism, namely Alox15 and Ptgs1.

**Table S3. Identifications and changing trends of the liver metabolites in untargeted metabolomics analysis (n = 6).**

| **HMDB ID** | **Description** | **FC** | **VIP** | ***P-FDR*** | **Ion mode** | **Formula** | **Monoisot-opic Mass** | **Adducts** | **Adduct M/Z** | **Mass error (ppm)** | **NC-RSD (%)** | **MASLD-RSD (%)** | **ECHF-RSD (%)** |
| --- | --- | --- | --- | --- | --- | --- | --- | --- | --- | --- | --- | --- | --- |
| HMDB0004236 | Prostaglandin B2* | 2.83 | >1.0 | 0.009 | ESI+ | C20H30O4 | 334.2144 | M+H-H2O | 317.2099 | 5.57 | 18.16% | 46.75% | 32.69% |
| HMDB0004244 | 15(S)-HPETE* | 2.75 | >1.0 | 0.000 | ESI+ | C20H32O4 | 336.2301 | M+H-H2O | 319.2252 | 6.77 | 10.93% | 42.66% | 39.36% |
| HMDB0001085 | Leukotriene B4 * | 3.57 | >1.0 | 0.001 | ESI+ | C20H32O4 | 336.2301 | M+NH4 | 354.2669 | 6.78 | 10.93% | 35.00% | 32.55% |
| HMDB0001043 | Arachidonic acid* | 13.15 | >1.0 | 0.000 | ESI- | C20H32O3 | 320.2351 | M-H | 319.2268 | 0.43 | 52.57% | 14.48% | 51.03% |
| HMDB0002685 | Prostaglandin F1a* | 13.92 | >1.0 | 0.000 | ESI- | C20H36O5 | 356.2563 | M-H-H2O | 337.2361 | 5.37 | 26.81% | 49.51% | 45.89% |

***Note:* FC, Fold change; VIP, Variable importance in projection of PLS-DA model; *P-FDR*, *P* value adjusted by false discovery rate; RSD, Relative Standard Deviation.**

**†: level 1, Identified based on an authentic standard.**

***: level 2, Identified by the accurate mass and observed MSn fragments which were acquired from UFLC-Q-TOF /MS analysis and the online database.**


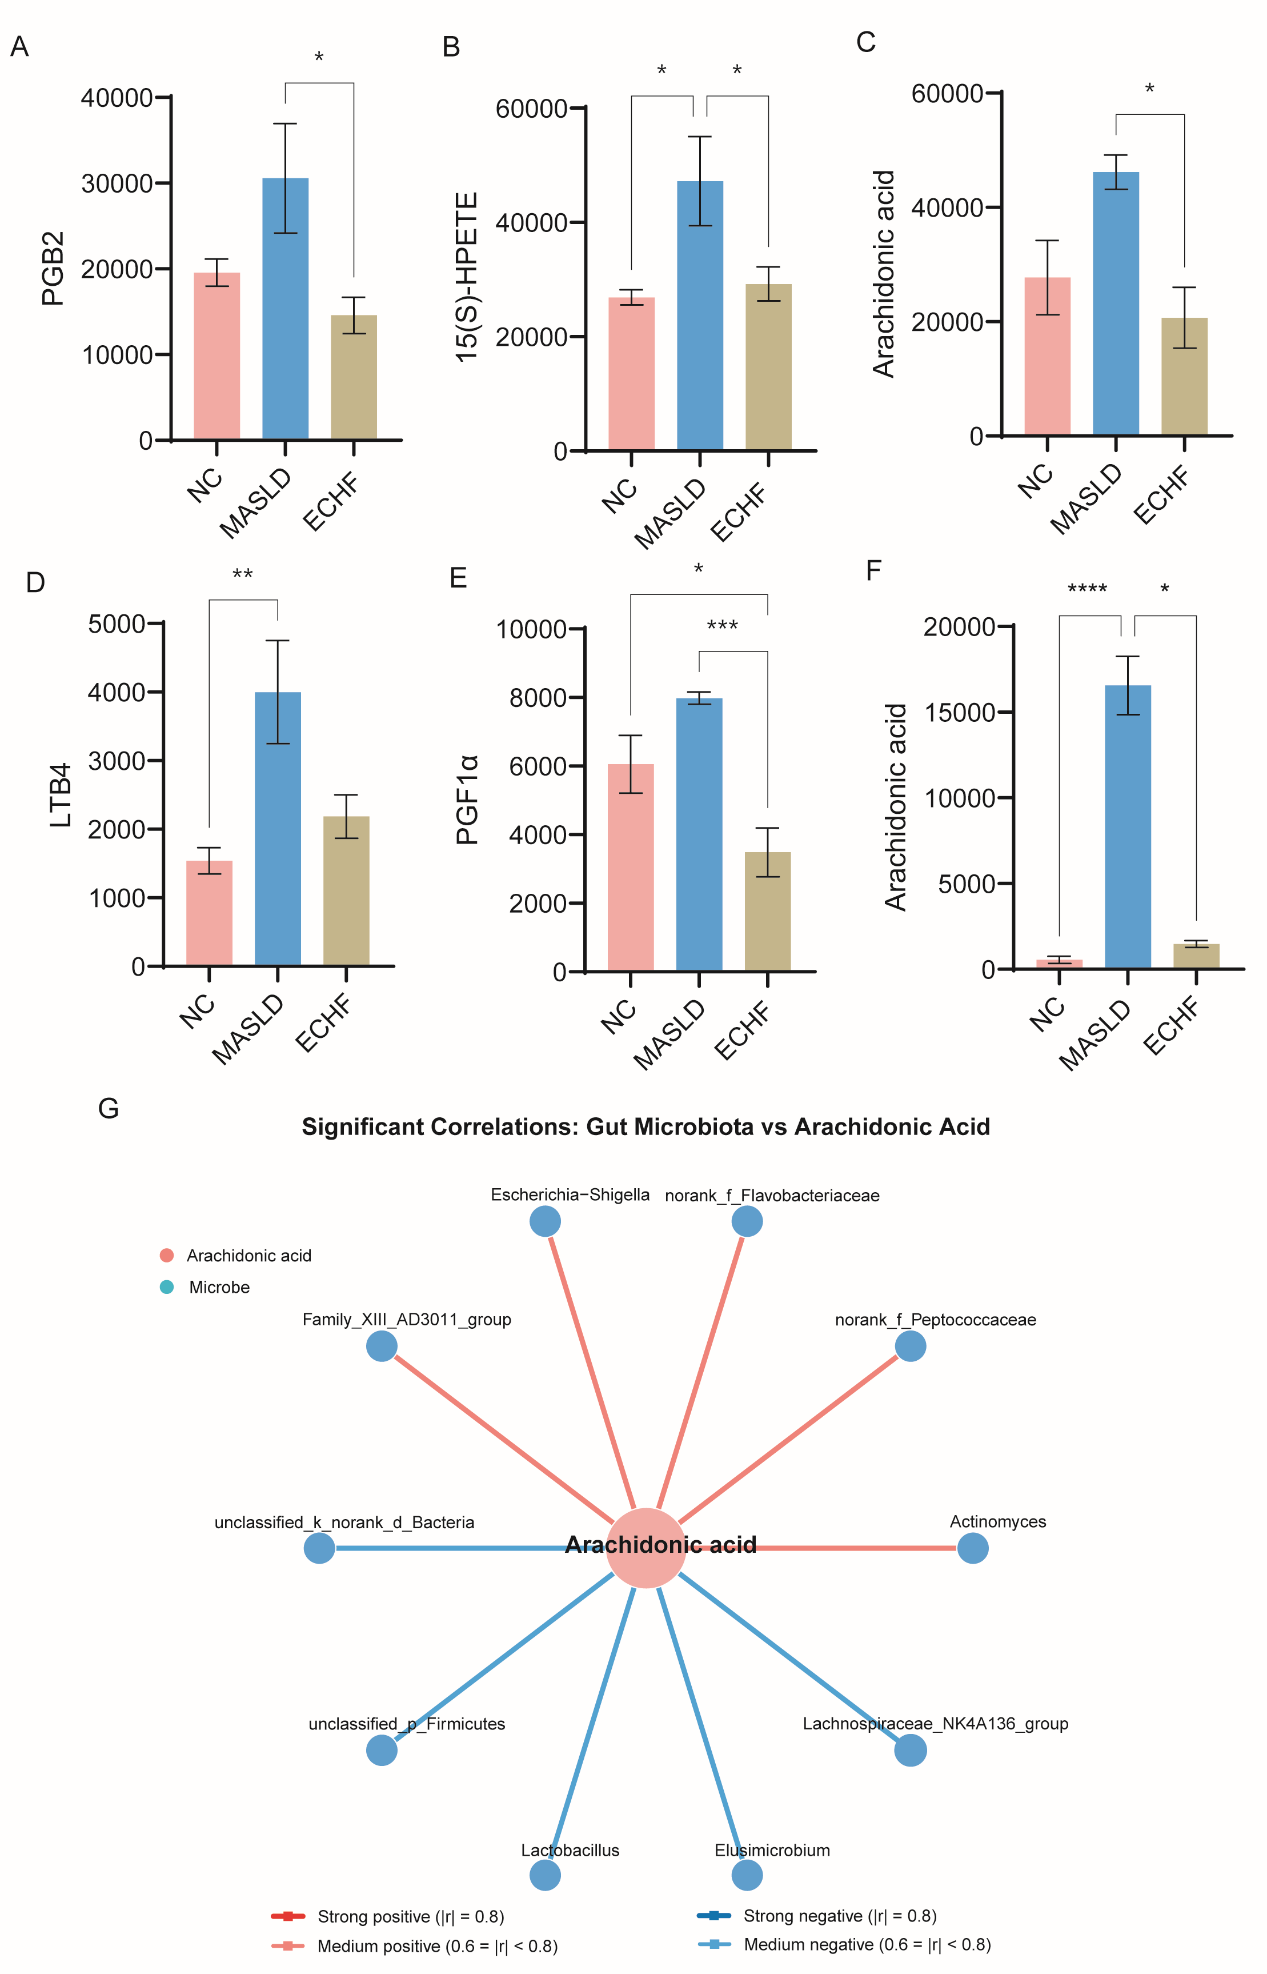


Figure S8. Analysis of intensities of arachidonic acid pathway-related metabolites in untargeted metabolomics of liver and feces, and correlation analysis between differential intestinal microbiota and fecal intestinal microbiota. (A-E) Analysis of intensities of arachidonic acid pathway-related metabolites in liver. (F) Analysis of arachidonic acid intensity in feces. (G) Correlation plots of the top five microbiota with the strongest positive and negative correlations between intestinal microbiota and arachidonic acid.

Figure S9. Correlation network analysis of differentially expressed genes (DEGs) and significantly altered metabolites. (Threshold criteria: p-value < 0.05 and correlation coefficient > 0.8) (For details, please refer to the uploaded PDF file of Figure S9)


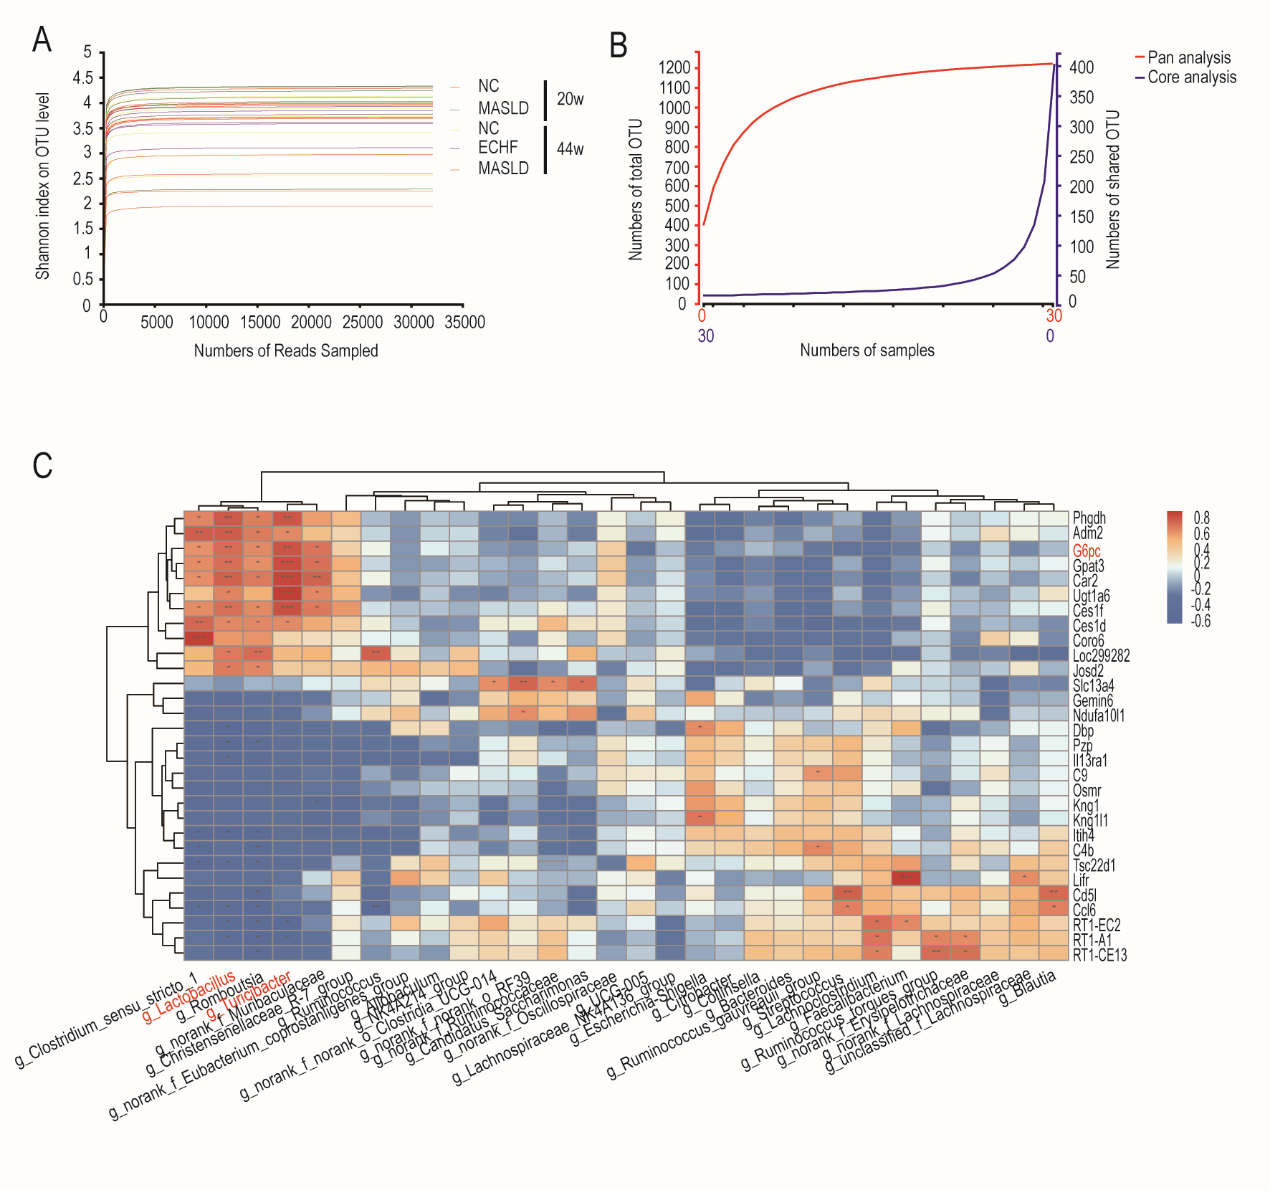


**Figure S10.** (A) Sequencing depth of 18 samples. (B) Pan and Core analysis of 18 samples. (C) Association between 36 shared DEGs and core gut bacteria genera.


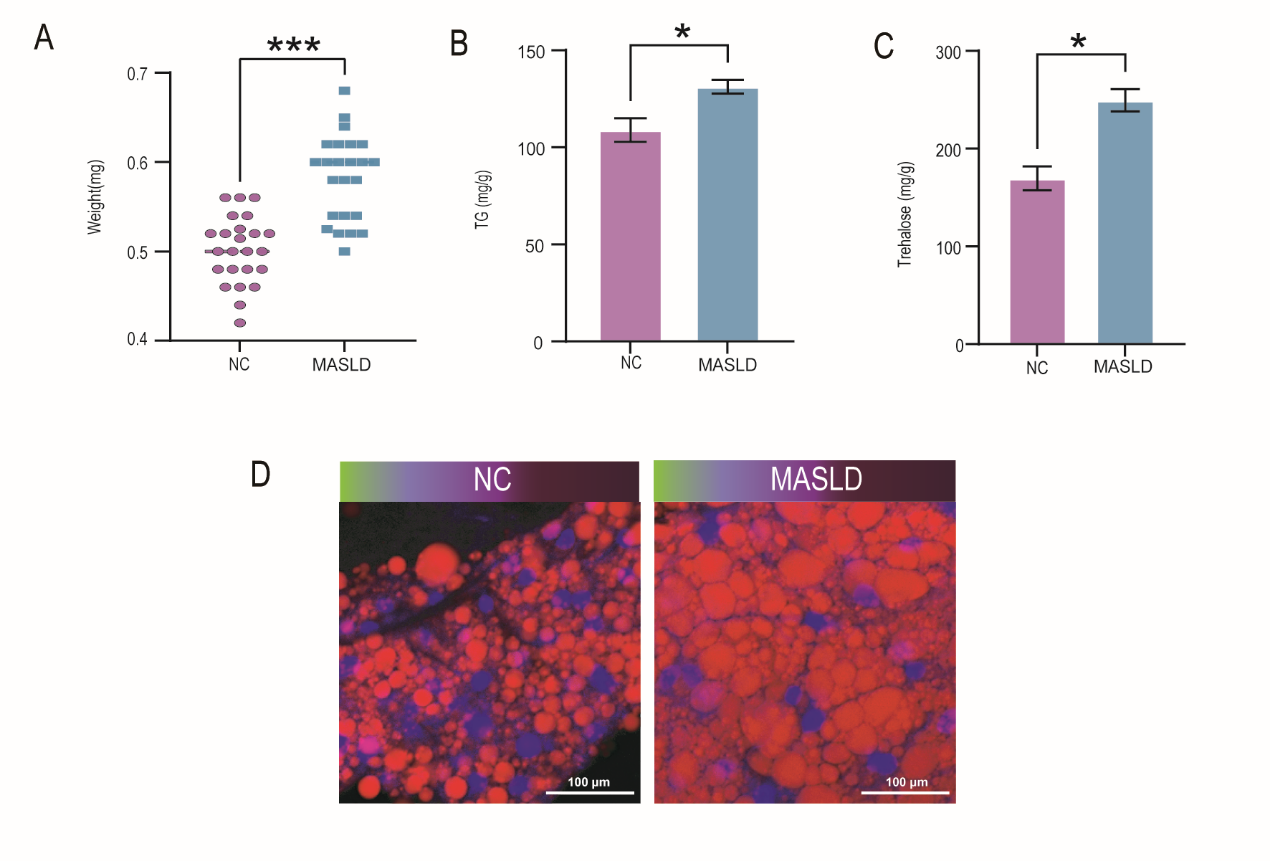


**Figure S11. Establishment of a high-fat diet-induced MASLD model in *Drosophila melanogaster*.** (A) Comparative analysis of body weight in w1118 flies across experimental groups. (B) Quantification of triglyceride (TG) levels in *w1118* flies, comparing normal control (NC) and MASLD groups. (C) Measurement of trehalose levels in w1118 flies between NC and MASLD groups. (D) Representative images of Nile Red staining in *Drosophila* fat bodies at day 20, comparing NC and MASLD groups (Scale bars = 100 μm). Statistical significance was determined using Mann-Whitney U test (*p < 0.05, **p < 0.01, ***p < 0.001), with n = 10 biological replicates per group.


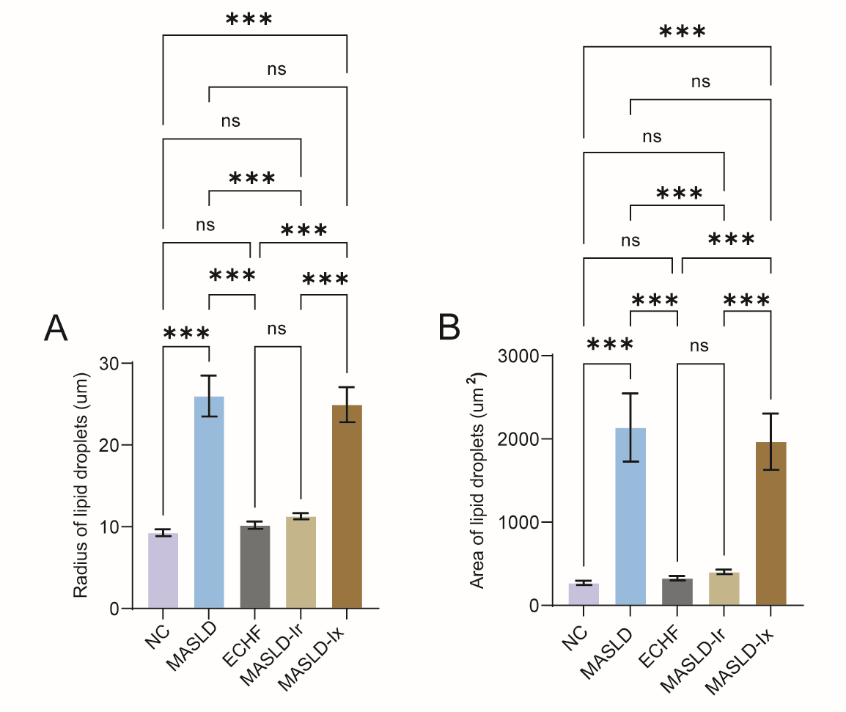


**Figure S12. Assessing the effects of ECHF intervention and FMT on lipid droplet size in Drosophila fat bodies.**(A) Lipid droplet radius. (B) Lipid droplet area.

***
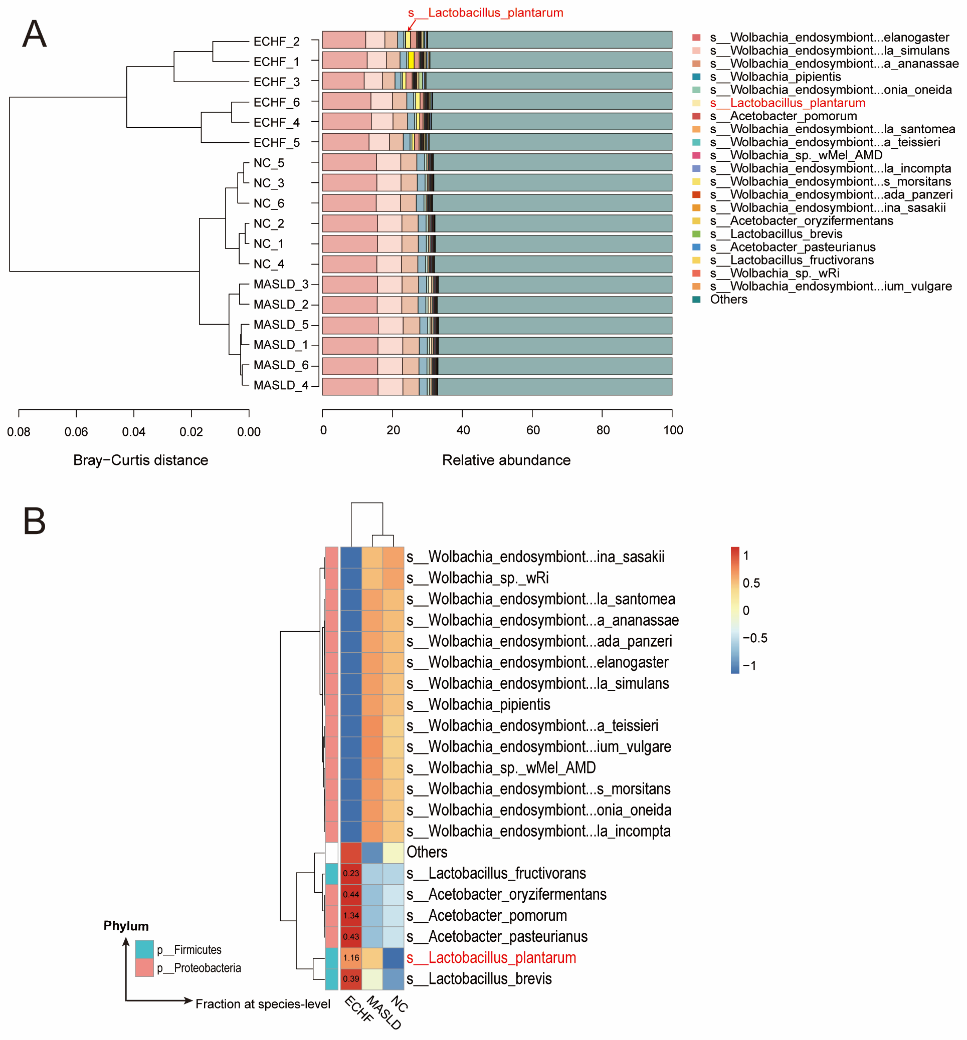
***

**Figure S13. Species-level analysis of the Drosophila gut microbiota.** (A) Compositional distribution of bacterial species across different samples. (B) Heatmap showing the relative abundance of species in the NC, MASLD, and ECHF groups. Numerical values in the heatmap indicate the percentage of each species. Note that the abundance of Lactobacillus plantarum was highest in the ECHF group.


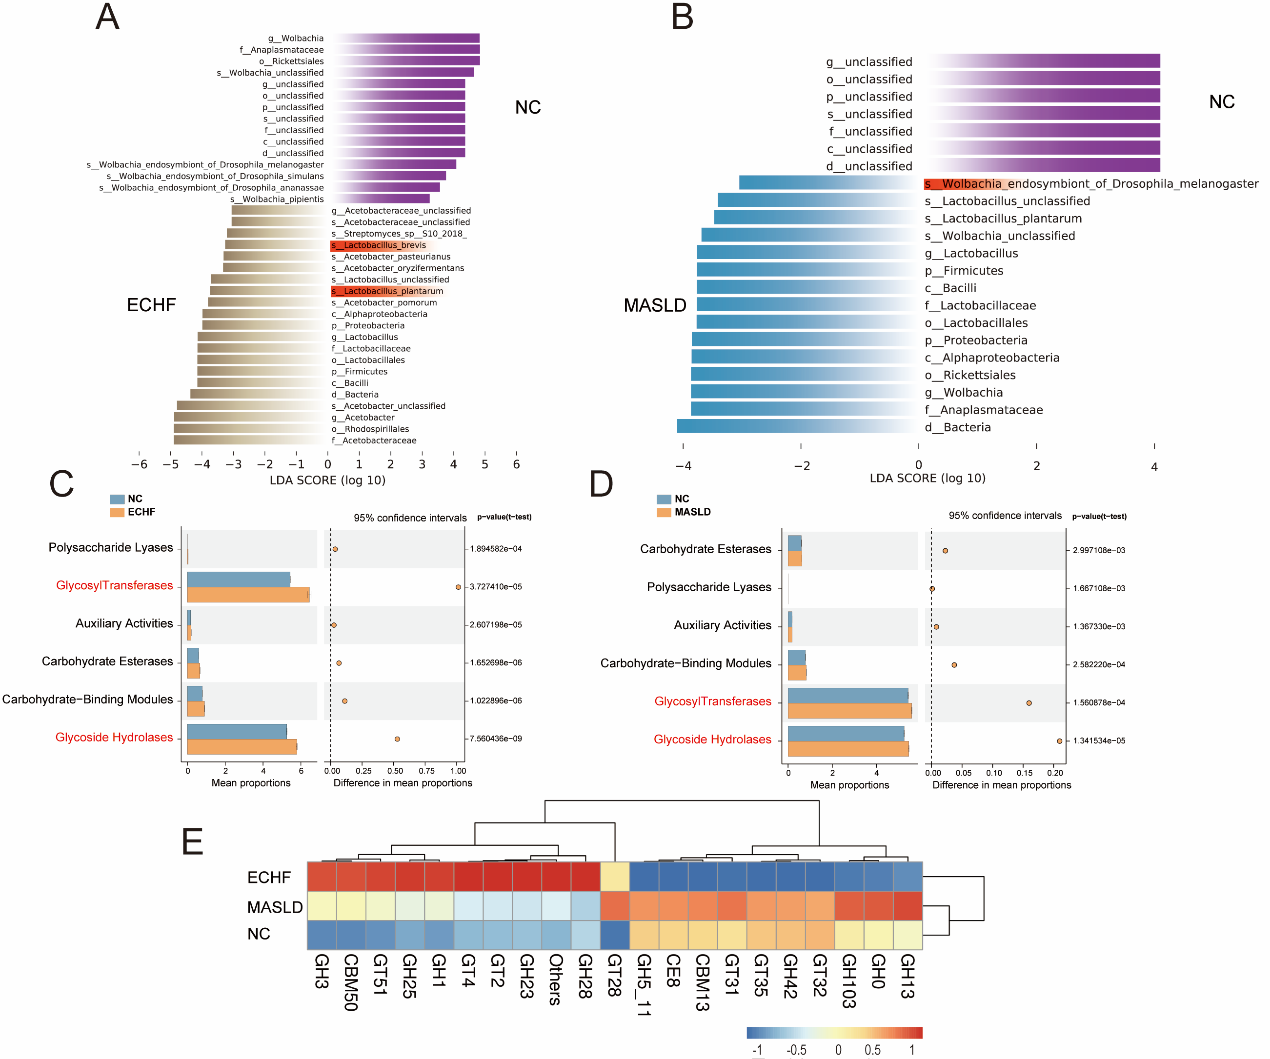


**Figure S14.** (A-B) LEfSe analysis comparing the NC and ECHF groups (A), the NC and MASLD groups (B). (C-D) CAZy functional profiling of significant gut genera between the NC and ECHF groups (C), the NC and MASLD groups (D). (E) Heatmap of the distribution of enzymes involved in carbohydrate metabolism in the NC、MASLD and ECHF groups.


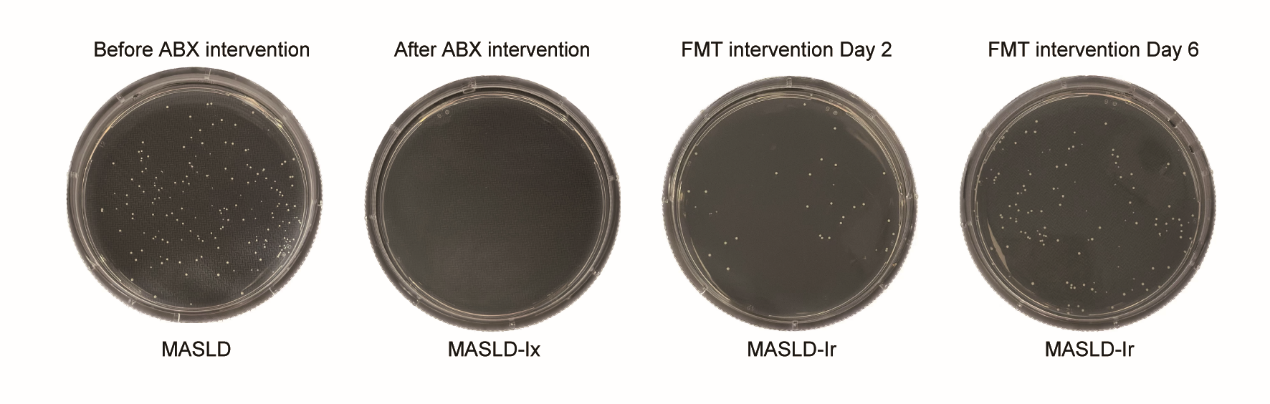


Figure S15. Dynamics of fecal microbiota composition following antibiotic intervention and fecal microbiota transplantation (FMT).


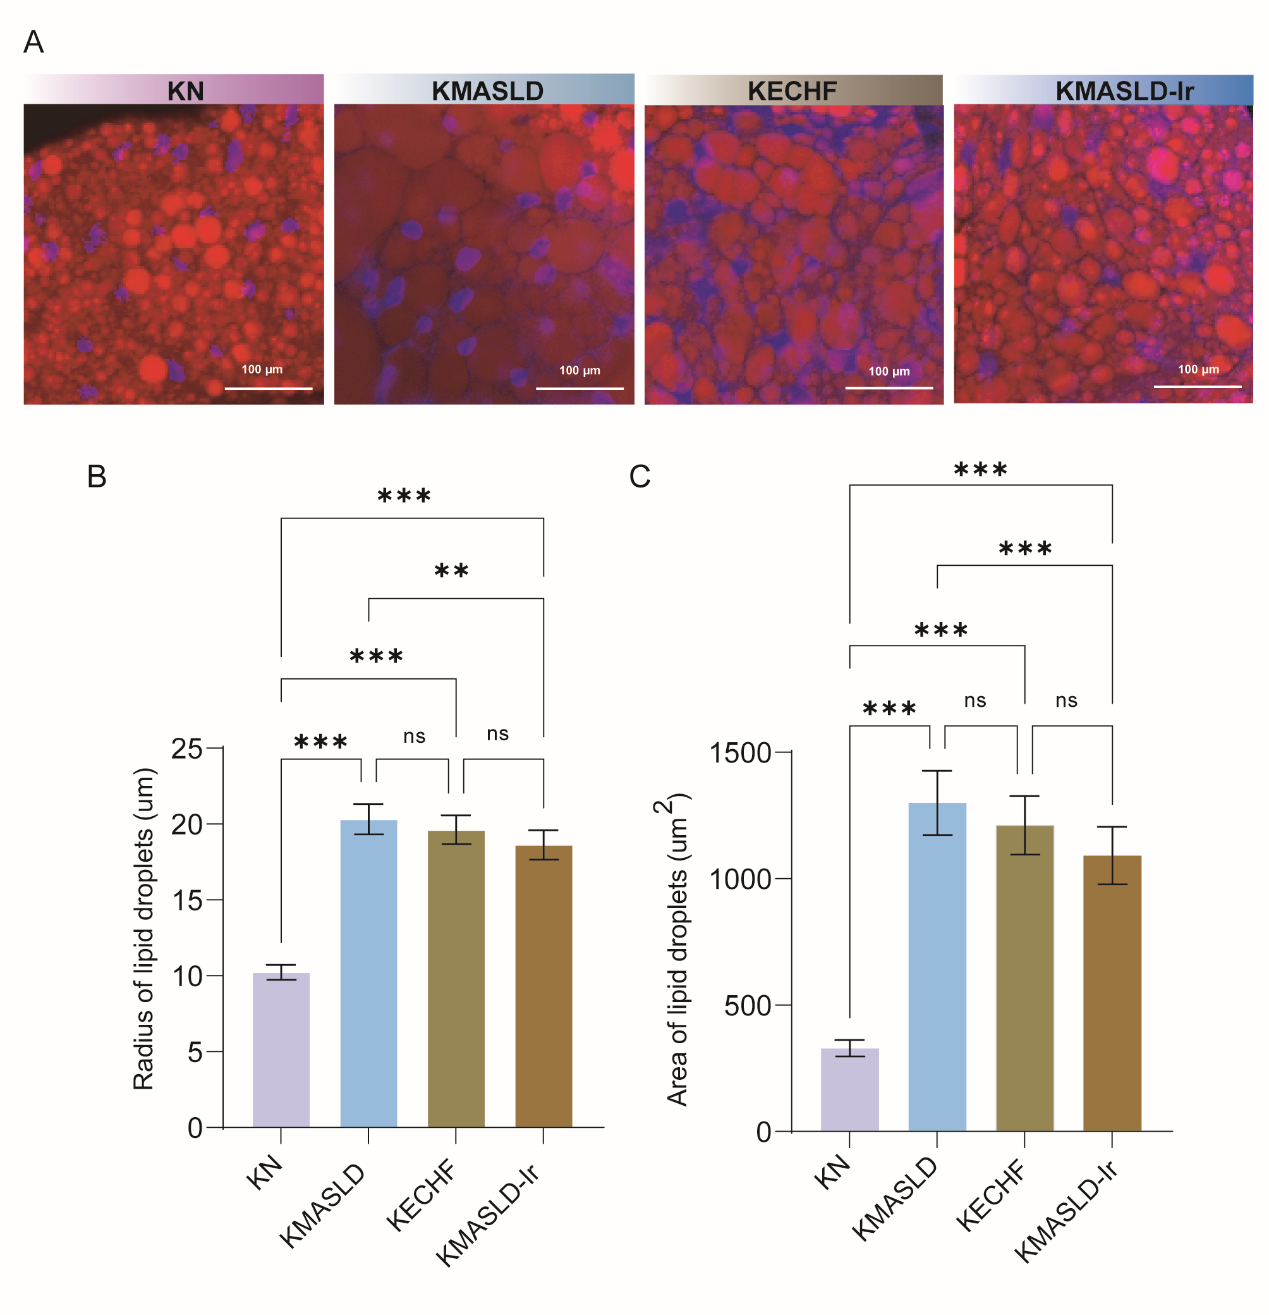


**Figure S16: Analysis of lipid droplets in the fat body of G6pc-KO flies upon ECHF and microbiota transplantation.** (A) Representative Nile red staining images. (B) Lipid droplet radius measurement. (C) Lipid droplet area measurement.
